# Supplementary material
Source: MDPI journal article supplement (https://www.mdpi.com/2410-3888/9/1/15)
Supplement: s1 [file s1]

## Supplementary Materials

**Table S1.** Summary of 19 microsatellite loci used in preliminary genetic screenings of 40 individuals from four Walleye populations.

| Locus        | Size Range (bp) | Number of Alleles | Repeat                                                      | T <sub>m</sub> (°C) | Source |
|--------------|-----------------|-------------------|-------------------------------------------------------------|---------------------|--------|
| <i>Svi2</i>  | 190-208         | 9                 | (AC) <sub>18</sub>                                          | 54                  | [1]    |
| <i>Svi4</i>  | 102-118         | 8                 | (AC) <sub>16</sub>                                          | 62                  | [2]    |
| <i>Svi5</i>  | 178-191         | NA                | (AC) <sub>18</sub>                                          | 54                  | [1]    |
| <i>Svi6</i>  | 135-169         | 18                | (AC) <sub>19</sub>                                          | 60                  | [1]    |
| <i>Svi7</i>  | 163-173         | NA                | (AC) <sub>14</sub>                                          | 53                  | [1]    |
| <i>Svi10</i> | 163-253         | 43                | NA                                                          | 54                  | [3]    |
| <i>Svi11</i> | 308-457         | 64                | NA                                                          | 5                   | [3]    |
| <i>Svi16</i> | 212-266         | 18                | (AC) <sub>5</sub> n <sub>5</sub> (AC) <sub>30</sub>         | 55                  | [1]    |
| <i>Svi17</i> | 101-113         | 8                 | (AC) <sub>13</sub>                                          | 60                  | [2]    |
| <i>Svi18</i> | 118-126         | 5                 | (AC) <sub>18</sub>                                          | 58                  | [2]    |
| <i>Svi20</i> | 144-193         | 18                | (AC) <sub>20</sub>                                          | 53                  | [1]    |
| <i>Svi26</i> | 156-189         | 16                | (AC) <sub>13</sub> n <sub>2</sub> (AC) <sub>19</sub>        | 58                  | [1]    |
| <i>Svi33</i> | 90-102          | 7                 | (AC) <sub>14</sub>                                          | 60                  | [2]    |
| <i>SviL1</i> | 199-237         | 13                | (GT) <sub>27</sub> GA(GT) <sub>3</sub> TT(GT) <sub>32</sub> | 53                  | [4]    |
| <i>SviL2</i> | 175-203         | 11                | (TAA) <sub>14</sub>                                         | 53                  | [4]    |
| <i>SviL5</i> | 188-224         | 11                | (CA) <sub>18</sub>                                          | 55                  | [4]    |
| <i>SviL6</i> | 111-137         | 9                 | (AC) <sub>17</sub>                                          | 53                  | [4]    |
| <i>SviL7</i> | 195-235         | 11                | (TG) <sub>22</sub>                                          | 53                  | [4]    |
| <i>SviL8</i> | 105-145         | 9                 | (TG) <sub>22</sub>                                          | 53                  | [4]    |

- [1] Eldridge, W.E.; Bacigalupi, M.D.; Adelman, I.R.; Miller, L.M.; Kapuscinski, A.R. Determination of relative survival of two stocked Walleye populations and resident natural-origin fish by microsatellite DNA parentage assignment. *Canad J Fish Aquat Sci* **2002**, *59*, 282-290.
- [2] Borer, S.O.; Miller, L.M.; Kapuscinski, A.R. Microsatellites in walleye *Stizostedion vitreum*. *Molec Ecol* **1999**, *8*(2), 336-338.
- [3] Cena, C.J.; Morgan, G.E.; Malette, M.D.; Heath, D.D. 2006. Inbreeding, outbreeding and environmental effects on genetic diversity in 46 Walleye (*Sander vitreus*) populations. *Molec Ecol* **2006**, *15*, 303-320.
- [4] Wirth, T.; Saint-Laurent, R.; Bernatchez, L. Isolation and characterization of microsatellite loci in the Walleye (*Stizostedion vitreum*), and cross-species amplification within the family Percidae. *Molec Ecol* **1999**, *8*, 1960-1963.

**Table S2.** PCR protocols for amplification of 8 microsatellite loci used to assess population genetic structure of Walleye.

---

Master mixes:

Master Mix 1: 22 $\mu$ l PCR solution contained 0.22 U/ $\mu$ l of 5X GoTaq Flexi Promega Buffer, 0.17 U/ $\mu$ l of 25 $\mu$ M of MgCl<sub>2</sub>, 2.5 $\mu$ M of dNTPs, 5 $\mu$ M concentration of both forward and reverse primer, with 0.01 U/ $\mu$ l of DNA Taq polymerase.

Master Mix 2: 17 $\mu$ l PCR solution contained 0.20 U/ $\mu$ l of 5X GoTaq Flexi Promega Buffer, 0.15 U/ $\mu$ l of 25 $\mu$ M of MgCl<sub>2</sub>, 2.5 $\mu$ M of dNTPs, 5 $\mu$ M concentration of both forward and reverse primer, with 0.012 U/ $\mu$ l of DNA Taq polymerase.

Master Mix 3: 22 $\mu$ l PCR solution contained 0.15 U/ $\mu$ l of 5X GoTaq Flexi Promega Buffer, 0.20 U/ $\mu$ l of 25 $\mu$ M of MgCl<sub>2</sub>, 2.5 $\mu$ M of dNTPs, 5 $\mu$ M concentration of both forward and reverse primer, with 0.016 U/ $\mu$ l of DNA Taq polymerase.

PCR protocols:

PCR Protocol 1: 95°C of initial denaturation for 5 minutes, followed by 10 cycles of 94°C for 1 minute, 50°C for 1 minute, and 72°C for 1 minute. This was followed by 29 cycles of 94°C for 1 minute, 59°C for 1 minute, and 72°C for 1 minute, with a final extension at 72°C for 10 minutes.

PCR Protocol 2: 94°C of initial denaturation for 3 minutes, followed by 30 cycles of 94°C for 1 minute, 57°C for 1 minute, and 72°C for 1 minute and 30 seconds, with a final extension at 72°C for 5 minutes.

PCR Protocol 3: 96°C of initial denaturation for 3 minutes, followed by 30 cycles of 96°C for 30 seconds, 53°C for 30 seconds, and 72°C for 1 minute, with a final extension at 72°C for 5 minutes.

PCR Protocol 4: 94°C of initial denaturation for 2 minutes, followed by 35 cycles of 94°C for 30 seconds, 48°C for 1 minute, and 72°C for 30 seconds, with a final extension at 72°C for 5 minutes.

---

**Table S3.** Frequencies of null alleles in regional assemblages of populations estimated using Microchecker [5]. Because the Mobile Bay drainage and Great Lakes samples had high frequencies of missing data and a reduced number of polymorphic loci, estimation of null allele frequencies could not be completed.

| <b>Population</b>   | <i>Svi5</i> | <i>Svi6</i> | <i>Svi16</i> | <i>Svi17</i> | <i>Svi18</i> | <i>Svi33</i> | <i>SviL1</i> | <i>SviL7</i> |
|---------------------|-------------|-------------|--------------|--------------|--------------|--------------|--------------|--------------|
| Mobile Bay drainage | -           | -           | -            | -            | -            | -            | -            | -            |
| Mississippi River   | 0.08        | 0.41        | 0.14         | 0.326        | 0.20         | 0.21         | 0.09         | 0.07         |
| Tennessee River     | 0.06        | 0.14        | 0.11         | 0.25         | 0.32         | 0.26         | 0.26         | 0.29         |
| New River           | -           | 0.23        | 0.10         | 0.16         | -            | 0.08         | 0.17         | 0.13         |
| Ohio River          | 0.04        | 0.16        | 0.05         | 0.29         | 0.05         | 0.24         | 0.26         | 0.19         |
| Great Lakes         | -           | -           | -            | -            | -            | -            | -            | -            |

[5] Van Oosterhout, C.; Hutchinson, W.F.; Willis, D.P.M.; Shipley, P. MICRO-CHECKER: software for identifying and correcting genotyping errors in microsatellite data. *Molec Ecol Notes* **2004**, *4*, 535-538.

**Table S4.** Full locus-by-locus genetic diversity indices for each population of Walleye.

| <b>Population</b>                | <b><i>N</i></b> | <b>Gene<br/>Copies</b> | <b>Alleles</b> | <b><i>H</i><sub>o</sub></b> | <b><i>H</i><sub>e</sub></b> | <b>Allele<br/>Range</b> | <b><i>M</i></b> |
|----------------------------------|-----------------|------------------------|----------------|-----------------------------|-----------------------------|-------------------------|-----------------|
| Mobile Bay drainage              |                 |                        |                |                             |                             |                         |                 |
| Coosa drainage, AL               | <i>Svi17</i>    | 30                     | 3              | 0.00                        | 0.54                        | 4                       | 0.60            |
|                                  | <i>Svi33</i>    | 30                     | 2              | 0.00                        | 0.50                        | 2                       | 0.66            |
|                                  | <i>Svi18</i>    | 30                     | 5              | 0.93                        | 0.72                        | 16                      | 0.29            |
|                                  | <i>SviL1</i>    | 30                     | 2              | 0.33                        | 0.29                        | 6                       | 0.29            |
| Tombigbee drainage, AL           | <i>Svi6</i>     | 88                     | 2              | 0.00                        | 0.51                        | 144                     | 0.01            |
|                                  | <i>Svi5</i>     | 88                     | 3              | 0.00                        | 0.62                        | 142                     | 0.02            |
|                                  | <i>Svi17</i>    | 88                     | 4              | 0.00                        | 0.47                        | 103                     | 0.04            |
|                                  | <i>Svi33</i>    | 88                     | 4              | 0.00                        | 0.45                        | 6                       | 0.57            |
|                                  | <i>Svi18</i>    | 88                     | 6              | 1.00                        | 0.63                        | 14                      | 0.40            |
|                                  | <i>SviL1</i>    | 88                     | 4              | 0.39                        | 0.61                        | 16                      | 0.24            |
| Mississippi River drainage       |                 |                        |                |                             |                             |                         |                 |
| Fellows Lake, MO                 | <i>Svi6</i>     | 18                     | 5              | 0.78                        | 0.80                        | 8                       | 0.56            |
|                                  | <i>Svi5</i>     | 18                     | 10             | 0.89                        | 0.93                        | 42                      | 0.23            |
|                                  | <i>SviL7</i>    | 18                     | 6              | 0.44                        | 0.81                        | 10                      | 0.55            |
|                                  | <i>Svi16</i>    | 18                     | 8              | 0.67                        | 0.89                        | 20                      | 0.38            |
|                                  | <i>Svi17</i>    | 18                     | 4              | 0.22                        | 0.76                        | 103                     | 0.04            |
|                                  | <i>Svi33</i>    | 18                     | 3              | 0.89                        | 0.63                        | 83                      | 0.04            |
|                                  | <i>SviL1</i>    | 18                     | 9              | 0.67                        | 0.91                        | 179                     | 0.05            |
| Stockton Lake, MO                | <i>Svi6</i>     | 42                     | 7              | 0.43                        | 0.79                        | 146                     | 0.05            |
|                                  | <i>Svi5</i>     | 42                     | 13             | 0.81                        | 0.92                        | 186                     | 0.07            |
|                                  | <i>SviL7</i>    | 42                     | 9              | 0.24                        | 0.84                        | 239                     | 0.04            |
|                                  | <i>Svi16</i>    | 42                     | 13             | 0.57                        | 0.86                        | 205                     | 0.06            |
|                                  | <i>Svi17</i>    | 42                     | 7              | 0.71                        | 0.81                        | 109                     | 0.06            |
|                                  | <i>Svi33</i>    | 42                     | 5              | 0.48                        | 0.89                        | 85                      | 0.06            |
|                                  | <i>Svi18</i>    | 42                     | 4              | 0.00                        | 0.52                        | 120                     | 0.03            |
|                                  | <i>SviL1</i>    | 42                     | 9              | 0.29                        | 0.61                        | 181                     | 0.05            |
| Beaver/Table Rock Lake,<br>AK/MO | <i>Svi6</i>     | 40                     | 6              | 0.05                        | 0.76                        | 10                      | 0.55            |
|                                  | <i>Svi5</i>     | 40                     | 12             | 0.90                        | 0.90                        | 24                      | 0.48            |
|                                  | <i>SviL7</i>    | 40                     | 8              | 0.85                        | 0.86                        | 14                      | 0.53            |
|                                  | <i>Svi16</i>    | 40                     | 13             | 0.70                        | 0.92                        | 201                     | 0.06            |
|                                  | <i>Svi17</i>    | 40                     | 7              | 0.60                        | 0.82                        | 108                     | 0.06            |
|                                  | <i>Svi33</i>    | 40                     | 6              | 0.25                        | 0.76                        | 87                      | 0.07            |
|                                  | <i>Svi18</i>    | 40                     | 6              | 0.05                        | 0.71                        | 10                      | 0.55            |
| James/Table Rock Lake,<br>MO     | <i>Svi6</i>     | 40                     | 6              | 0.10                        | 0.59                        | 12                      | 0.46            |
|                                  | <i>Svi5</i>     | 40                     | 8              | 0.50                        | 0.82                        | 18                      | 0.42            |
|                                  | <i>SviL7</i>    | 40                     | 9              | 0.85                        | 0.83                        | 229                     | 0.04            |
|                                  | <i>Svi16</i>    | 40                     | 10             | 0.40                        | 0.85                        | 199                     | 0.05            |
|                                  | <i>Svi17</i>    | 40                     | 6              | 0.35                        | 0.81                        | 107                     | 0.06            |
|                                  | <i>Svi33</i>    | 40                     | 7              | 0.15                        | 0.79                        | 95                      | 0.07            |
|                                  | <i>Svi18</i>    | 40                     | 7              | 0.40                        | 0.79                        | 122                     | 0.06            |
| Mozingo Lake, MO                 | <i>Svi6</i>     | 38                     | 3              | 0.00                        | 0.65                        | 4                       | 0.60            |

|                                 |              |     |    |      |      |     |      |
|---------------------------------|--------------|-----|----|------|------|-----|------|
|                                 | <i>Svi5</i>  | 38  | 10 | 0.68 | 0.84 | 18  | 0.53 |
|                                 | <i>SviL7</i> | 38  | 7  | 0.85 | 0.85 | 12  | 0.54 |
|                                 | <i>SviI6</i> | 38  | 10 | 0.32 | 0.82 | 199 | 0.05 |
|                                 | <i>SviI7</i> | 38  | 5  | 0.42 | 0.77 | 10  | 0.45 |
|                                 | <i>Svi33</i> | 38  | 8  | 0.47 | 0.85 | 95  | 0.08 |
|                                 | <i>SviI8</i> | 38  | 8  | 0.32 | 0.80 | 122 | 0.07 |
|                                 | <i>SviL1</i> | 38  | 3  | 0.05 | 0.10 | 159 | 0.02 |
| Smithville Lake, MO             | <i>Svi6</i>  | 32  | 5  | 0.00 | 0.71 | 8   | 0.56 |
|                                 | <i>Svi5</i>  | 32  | 12 | 0.75 | 0.88 | 22  | 0.52 |
|                                 | <i>SviL7</i> | 32  | 8  | 0.94 | 0.87 | 14  | 0.53 |
|                                 | <i>SviI6</i> | 32  | 14 | 0.63 | 0.92 | 32  | 0.42 |
|                                 | <i>SviI7</i> | 32  | 5  | 0.44 | 0.81 | 105 | 0.05 |
|                                 | <i>Svi33</i> | 32  | 8  | 0.56 | 0.80 | 95  | 0.08 |
|                                 | <i>SviI8</i> | 32  | 6  | 0.25 | 0.76 | 12  | 0.46 |
| Current River, MO               | <i>Svi6</i>  | 56  | 5  | 0.00 | 0.74 | 8   | 0.56 |
|                                 | <i>Svi5</i>  | 56  | 8  | 0.21 | 0.48 | 158 | 0.05 |
|                                 | <i>SviL7</i> | 56  | 2  | 0.00 | 0.07 | 225 | 0.01 |
|                                 | <i>SviI7</i> | 56  | 3  | 0.00 | 0.57 | 101 | 0.03 |
|                                 | <i>Svi33</i> | 56  | 5  | 0.04 | 0.58 | 83  | 0.06 |
|                                 | <i>SviI8</i> | 56  | 6  | 0.75 | 0.81 | 10  | 0.55 |
|                                 | <i>SviL1</i> | 56  | 13 | 0.61 | 0.91 | 205 | 0.06 |
| Black River, AK                 | <i>Svi6</i>  | 52  | 6  | 0.00 | 0.70 | 12  | 0.46 |
|                                 | <i>Svi5</i>  | 52  | 9  | 0.31 | 0.51 | 156 | 0.06 |
|                                 | <i>SviL7</i> | 52  | 5  | 0.08 | 0.22 | 239 | 0.02 |
|                                 | <i>SviI7</i> | 52  | 2  | 0.00 | 0.48 | 2   | 0.67 |
|                                 | <i>Svi33</i> | 52  | 6  | 0.15 | 0.63 | 87  | 0.07 |
|                                 | <i>SviI8</i> | 52  | 8  | 0.96 | 0.48 | 14  | 0.53 |
|                                 | <i>SviL1</i> | 52  | 15 | 0.73 | 0.92 | 203 | 0.07 |
| Tennessee River drainage        |              |     |    |      |      |     |      |
| Clinch and Powell Rivers,<br>VA | <i>Svi6</i>  | 158 | 11 | 0.57 | 0.79 | 152 | 0.07 |
|                                 | <i>Svi5</i>  | 158 | 15 | 0.56 | 0.80 | 174 | 0.09 |
|                                 | <i>SviL7</i> | 158 | 14 | 0.16 | 0.77 | 259 | 0.05 |
|                                 | <i>SviI6</i> | 158 | 13 | 0.24 | 0.78 | 215 | 0.06 |
|                                 | <i>SviI7</i> | 158 | 4  | 0.13 | 0.47 | 6   | 0.57 |
|                                 | <i>Svi33</i> | 158 | 10 | 0.37 | 0.84 | 95  | 0.10 |
|                                 | <i>SviI8</i> | 158 | 11 | 0.27 | 0.72 | 142 | 0.08 |
|                                 | <i>SviL1</i> | 158 | 20 | 0.41 | 0.90 | 203 | 0.10 |
| Lake Fontana, NC                |              |     |    |      |      |     |      |
| Lake Fontana, NC                | <i>Svi6</i>  | 84  | 11 | 0.38 | 0.87 | 150 | 0.07 |
|                                 | <i>Svi5</i>  | 84  | 15 | 0.83 | 0.92 | 28  | 0.52 |
|                                 | <i>SviL7</i> | 84  | 18 | 0.40 | 0.90 | 38  | 0.46 |
|                                 | <i>SviI6</i> | 84  | 9  | 0.17 | 0.45 | 211 | 0.04 |
|                                 | <i>SviI7</i> | 84  | 6  | 0.29 | 0.82 | 107 | 0.06 |
|                                 | <i>Svi33</i> | 84  | 8  | 0.48 | 0.82 | 95  | 0.08 |
|                                 | <i>SviI8</i> | 84  | 10 | 0.02 | 0.83 | 138 | 0.07 |
|                                 | <i>SviL1</i> | 84  | 9  | 0.07 | 0.41 | 191 | 0.05 |

|                     |              |     |    |      |      |     |      |
|---------------------|--------------|-----|----|------|------|-----|------|
| Nantahala Lake, NC  | <i>Svi6</i>  | 54  | 8  | 0.41 | 0.82 | 14  | 0.53 |
|                     | <i>Svi5</i>  | 54  | 12 | 0.78 | 0.89 | 26  | 0.44 |
|                     | <i>SviL7</i> | 54  | 13 | 0.41 | 0.83 | 36  | 0.35 |
|                     | <i>Svi17</i> | 54  | 5  | 0.15 | 0.80 | 105 | 0.05 |
|                     | <i>Svi33</i> | 54  | 5  | 0.07 | 0.46 | 87  | 0.06 |
|                     | <i>Svi18</i> | 54  | 7  | 0.00 | 0.76 | 134 | 0.05 |
| Lake Santeetlah, NC | <i>Svi6</i>  | 36  | 9  | 0.56 | 0.89 | 18  | 0.47 |
|                     | <i>Svi5</i>  | 36  | 11 | 0.50 | 0.91 | 172 | 0.06 |
|                     | <i>SviL7</i> | 36  | 14 | 0.61 | 0.93 | 261 | 0.05 |
|                     | <i>Svi17</i> | 36  | 5  | 0.56 | 0.73 | 105 | 0.05 |
|                     | <i>Svi33</i> | 36  | 5  | 0.28 | 0.63 | 95  | 0.05 |
|                     | <i>Svi18</i> | 36  | 6  | 0.06 | 0.82 | 128 | 0.05 |
| Bear Lake, NC       | <i>Svi6</i>  | 48  | 6  | 0.50 | 0.78 | 12  | 0.46 |
|                     | <i>Svi5</i>  | 48  | 12 | 0.54 | 0.88 | 24  | 0.48 |
|                     | <i>SviL7</i> | 48  | 13 | 0.50 | 0.81 | 28  | 0.45 |
|                     | <i>Svi17</i> | 48  | 5  | 0.29 | 0.77 | 8   | 0.56 |
|                     | <i>Svi33</i> | 48  | 7  | 0.38 | 0.81 | 95  | 0.07 |
|                     | <i>Svi18</i> | 48  | 4  | 0.00 | 0.67 | 6   | 0.57 |
| Wolf Lake, NC       | <i>Svi6</i>  | 32  | 6  | 0.81 | 0.78 | 10  | 0.55 |
|                     | <i>Svi5</i>  | 32  | 11 | 0.81 | 0.91 | 164 | 0.07 |
|                     | <i>SviL7</i> | 32  | 8  | 0.31 | 0.83 | 239 | 0.03 |
|                     | <i>Svi16</i> | 32  | 5  | 0.19 | 0.34 | 263 | 0.02 |
|                     | <i>Svi17</i> | 32  | 4  | 0.81 | 0.74 | 6   | 0.57 |
|                     | <i>Svi33</i> | 32  | 6  | 0.25 | 0.79 | 95  | 0.06 |
| Lake James, NC      | <i>Svi18</i> | 32  | 4  | 0.19 | 0.68 | 10  | 0.36 |
|                     | <i>Svi6</i>  | 100 | 8  | 0.54 | 0.83 | 14  | 0.53 |
|                     | <i>Svi5</i>  | 100 | 15 | 0.86 | 0.91 | 30  | 0.48 |
|                     | <i>SviL7</i> | 100 | 15 | 0.36 | 0.88 | 34  | 0.43 |
|                     | <i>Svi16</i> | 100 | 15 | 0.98 | 0.88 | 277 | 0.05 |
|                     | <i>Svi17</i> | 100 | 5  | 0.48 | 0.68 | 105 | 0.05 |
| Lake Hiwassee, NC   | <i>Svi33</i> | 100 | 6  | 0.26 | 0.78 | 87  | 0.07 |
|                     | <i>Svi18</i> | 100 | 10 | 0.36 | 0.84 | 18  | 0.53 |
|                     | <i>Svi6</i>  | 32  | 7  | 0.50 | 0.81 | 12  | 0.54 |
|                     | <i>Svi5</i>  | 32  | 9  | 0.81 | 0.86 | 18  | 0.47 |
|                     | <i>SviL7</i> | 32  | 7  | 0.19 | 0.79 | 24  | 0.28 |
|                     | <i>Svi17</i> | 32  | 4  | 0.31 | 0.72 | 103 | 0.04 |
| Lake Glenville, NC  | <i>Svi33</i> | 32  | 4  | 0.19 | 0.55 | 85  | 0.05 |
|                     | <i>Svi18</i> | 32  | 7  | 0.94 | 0.85 | 128 | 0.05 |
|                     | <i>Svi6</i>  | 48  | 8  | 0.53 | 0.86 | 14  | 0.53 |
|                     | <i>Svi5</i>  | 48  | 11 | 0.75 | 0.91 | 20  | 0.52 |
|                     | <i>SviL7</i> | 48  | 11 | 0.25 | 0.88 | 255 | 0.04 |
|                     | <i>Svi16</i> | 48  | 4  | 0.13 | 0.23 | 269 | 0.01 |
| New River, VA       | <i>Svi17</i> | 48  | 5  | 0.42 | 0.75 | 8   | 0.56 |
|                     | <i>Svi33</i> | 48  | 6  | 0.38 | 0.76 | 89  | 0.07 |
|                     | <i>Svi18</i> | 48  | 10 | 1.00 | 0.90 | 18  | 0.53 |
|                     | <i>Svi6</i>  | 234 | 10 | 0.44 | 0.86 | 18  | 0.53 |

|                                 |              |     |    |      |      |     |      |
|---------------------------------|--------------|-----|----|------|------|-----|------|
|                                 | <i>Svi5</i>  | 234 | 14 | 0.97 | 0.89 | 26  | 0.52 |
|                                 | <i>SviL7</i> | 234 | 23 | 0.89 | 0.94 | 263 | 0.09 |
|                                 | <i>SviI6</i> | 234 | 16 | 0.88 | 0.89 | 283 | 0.06 |
|                                 | <i>SviI7</i> | 234 | 2  | 0.02 | 0.02 | 2   | 0.67 |
|                                 | <i>Svi33</i> | 234 | 6  | 0.10 | 0.63 | 20  | 0.29 |
|                                 | <i>SviI8</i> | 234 | 10 | 1.00 | 0.88 | 20  | 0.78 |
| Ohio River drainage             |              |     |    |      |      |     |      |
| Barren River, KY                | <i>Svi6</i>  | 140 | 11 | 0.24 | 0.82 | 148 | 0.07 |
|                                 | <i>Svi5</i>  | 140 | 19 | 0.83 | 0.92 | 40  | 0.46 |
|                                 | <i>SviL7</i> | 140 | 17 | 0.67 | 0.91 | 36  | 0.46 |
|                                 | <i>SviI6</i> | 140 | 13 | 0.69 | 0.79 | 273 | 0.05 |
|                                 | <i>SviI7</i> | 140 | 5  | 0.07 | 0.62 | 105 | 0.05 |
|                                 | <i>Svi33</i> | 140 | 7  | 0.41 | 0.79 | 95  | 0.07 |
|                                 | <i>SviI8</i> | 140 | 11 | 0.67 | 0.83 | 136 | 0.08 |
|                                 | <i>SviL1</i> | 140 | 11 | 0.04 | 0.53 | 175 | 0.06 |
| Goose Creek, KY                 | <i>Svi6</i>  | 54  | 6  | 0.15 | 0.67 | 10  | 0.55 |
|                                 | <i>Svi5</i>  | 54  | 12 | 0.93 | 0.88 | 32  | 0.36 |
|                                 | <i>SviL7</i> | 54  | 13 | 0.70 | 0.86 | 257 | 0.05 |
|                                 | <i>SviI6</i> | 54  | 9  | 0.56 | 0.77 | 263 | 0.03 |
|                                 | <i>SviI7</i> | 54  | 4  | 0.00 | 0.59 | 103 | 0.04 |
|                                 | <i>Svi33</i> | 54  | 5  | 0.19 | 0.52 | 83  | 0.06 |
|                                 | <i>SviI8</i> | 54  | 7  | 1.00 | 0.82 | 12  | 0.54 |
| Rockcastle River, KY            | <i>Svi6</i>  | 88  | 8  | 0.45 | 0.77 | 164 | 0.05 |
|                                 | <i>Svi5</i>  | 88  | 15 | 0.93 | 0.90 | 46  | 0.32 |
|                                 | <i>SviL7</i> | 88  | 12 | 0.30 | 0.90 | 34  | 0.34 |
|                                 | <i>SviI6</i> | 88  | 8  | 0.52 | 0.78 | 189 | 0.04 |
|                                 | <i>SviI7</i> | 88  | 4  | 0.05 | 0.40 | 103 | 0.04 |
|                                 | <i>Svi33</i> | 88  | 7  | 0.30 | 0.66 | 20  | 0.33 |
|                                 | <i>SviI8</i> | 88  | 3  | 0.00 | 0.13 | 128 | 0.02 |
|                                 | <i>SviL1</i> | 88  | 11 | 0.50 | 0.88 | 20  | 0.52 |
| Levisa and Russell Forks,<br>KY | <i>Svi6</i>  | 30  | 6  | 0.53 | 0.74 | 142 | 0.04 |
|                                 | <i>Svi5</i>  | 30  | 12 | 0.93 | 0.90 | 44  | 0.27 |
|                                 | <i>SviL7</i> | 30  | 7  | 0.13 | 0.83 | 12  | 0.54 |
|                                 | <i>SviI6</i> | 30  | 10 | 0.53 | 0.77 | 203 | 0.05 |
|                                 | <i>SviI7</i> | 30  | 4  | 0.53 | 0.73 | 6   | 0.57 |
|                                 | <i>Svi33</i> | 30  | 7  | 0.67 | 0.79 | 20  | 0.33 |
|                                 | <i>SviL1</i> | 30  | 12 | 0.53 | 0.92 | 24  | 0.48 |
| Allegheny River, PA             | <i>Svi6</i>  | 42  | 6  | 0.90 | 0.79 | 144 | 0.04 |
|                                 | <i>Svi5</i>  | 42  | 10 | 0.57 | 0.88 | 18  | 0.53 |
|                                 | <i>SviL7</i> | 42  | 12 | 0.95 | 0.90 | 30  | 0.49 |
|                                 | <i>SviI6</i> | 42  | 6  | 0.29 | 0.82 | 10  | 0.55 |
|                                 | <i>SviI7</i> | 42  | 3  | 0.33 | 0.36 | 4   | 0.60 |
|                                 | <i>Svi33</i> | 42  | 9  | 0.33 | 0.85 | 20  | 0.43 |
|                                 | <i>SviI8</i> | 42  | 4  | 0.05 | 0.70 | 6   | 0.57 |
|                                 | <i>SviL1</i> | 42  | 11 | 0.52 | 0.90 | 24  | 0.44 |
| Great Lakes watersheds          |              |     |    |      |      |     |      |

|                      |              |    |    |      |      |     |      |
|----------------------|--------------|----|----|------|------|-----|------|
| Lake Erie            | <i>Svi6</i>  | 52 | 5  | 0.19 | 0.65 | 8   | 0.56 |
|                      | <i>Svi5</i>  | 52 | 7  | 0.65 | 0.80 | 16  | 0.41 |
|                      | <i>SviL7</i> | 52 | 8  | 0.50 | 0.84 | 26  | 0.30 |
|                      | <i>SviI6</i> | 52 | 6  | 1.00 | 0.79 | 10  | 0.55 |
|                      | <i>SviI7</i> | 52 | 2  | 0.04 | 0.04 | 2   | 0.67 |
|                      | <i>Svi33</i> | 52 | 5  | 0.35 | 0.78 | 14  | 0.33 |
|                      | <i>SviI8</i> | 52 | 6  | 1.00 | 0.79 | 10  | 0.55 |
| Lake Ontario         | <i>Svi6</i>  | 38 | 7  | 0.16 | 0.82 | 12  | 0.54 |
|                      | <i>Svi5</i>  | 38 | 12 | 0.79 | 0.92 | 22  | 0.52 |
|                      | <i>SviL7</i> | 38 | 10 | 0.37 | 0.88 | 24  | 0.40 |
|                      | <i>SviI6</i> | 38 | 11 | 0.63 | 0.83 | 273 | 0.04 |
|                      | <i>SviI7</i> | 38 | 4  | 0.58 | 0.72 | 103 | 0.04 |
|                      | <i>Svi33</i> | 38 | 5  | 0.37 | 0.79 | 87  | 0.06 |
|                      | <i>SviI8</i> | 38 | 9  | 0.95 | 0.89 | 16  | 0.53 |
| Mille Lacs, MN       | <i>Svi6</i>  | 40 | 5  | 0.05 | 0.72 | 8   | 0.56 |
|                      | <i>Svi5</i>  | 40 | 8  | 0.65 | 0.85 | 14  | 0.53 |
|                      | <i>SviL7</i> | 40 | 8  | 0.30 | 0.82 | 14  | 0.53 |
|                      | <i>SviI7</i> | 40 | 6  | 0.10 | 0.74 | 113 | 0.05 |
|                      | <i>Svi33</i> | 40 | 5  | 0.40 | 0.69 | 85  | 0.06 |
|                      | <i>SviI8</i> | 40 | 6  | 1.00 | 0.83 | 12  | 0.46 |
| Lake Michigan        | <i>Svi6</i>  | 40 | 5  | 0.10 | 0.64 | 10  | 0.45 |
|                      | <i>Svi5</i>  | 40 | 9  | 0.80 | 0.77 | 16  | 0.53 |
|                      | <i>SviL7</i> | 40 | 7  | 0.20 | 0.71 | 12  | 0.54 |
|                      | <i>SviI6</i> | 40 | 5  | 0.20 | 0.36 | 261 | 0.20 |
|                      | <i>SviI7</i> | 40 | 4  | 0.40 | 0.73 | 103 | 0.04 |
|                      | <i>Svi33</i> | 40 | 6  | 0.35 | 0.77 | 87  | 0.07 |
|                      | <i>SviI8</i> | 40 | 7  | 1.00 | 0.78 | 12  | 0.54 |
| Grand River, MI      | <i>Svi6</i>  | 26 | 4  | 0.08 | 0.72 | 6   | 0.57 |
|                      | <i>Svi5</i>  | 26 | 6  | 0.15 | 0.68 | 156 | 0.04 |
|                      | <i>SviL7</i> | 26 | 6  | 0.08 | 0.81 | 237 | 0.03 |
|                      | <i>SviI6</i> | 26 | 5  | 0.23 | 0.41 | 265 | 0.02 |
|                      | <i>SviI7</i> | 26 | 4  | 0.38 | 0.68 | 103 | 0.04 |
|                      | <i>Svi33</i> | 26 | 7  | 0.38 | 0.86 | 89  | 0.08 |
|                      | <i>SviI8</i> | 26 | 7  | 0.62 | 0.78 | 12  | 0.54 |
| Flint River, MI      | <i>Svi6</i>  | 40 | 7  | 0.80 | 0.85 | 12  | 0.54 |
|                      | <i>Svi5</i>  | 40 | 11 | 0.75 | 0.88 | 22  | 0.48 |
|                      | <i>SviL7</i> | 40 | 10 | 0.45 | 0.87 | 22  | 0.43 |
|                      | <i>SviI6</i> | 40 | 8  | 0.95 | 0.81 | 273 | 0.03 |
|                      | <i>SviI7</i> | 40 | 5  | 0.15 | 0.77 | 105 | 0.05 |
|                      | <i>Svi33</i> | 40 | 5  | 0.30 | 0.80 | 858 | 0.06 |
|                      | <i>SviI8</i> | 40 | 8  | 0.95 | 0.84 | 14  | 0.53 |
| St. Mary's River, MI | <i>Svi6</i>  | 38 | 9  | 0.32 | 0.81 | 16  | 0.53 |
|                      | <i>Svi5</i>  | 38 | 12 | 0.84 | 0.91 | 24  | 0.48 |
|                      | <i>SviL7</i> | 38 | 6  | 0.37 | 0.83 | 14  | 0.40 |
|                      | <i>SviI6</i> | 38 | 8  | 0.37 | 0.59 | 273 | 0.03 |
|                      | <i>SviI7</i> | 38 | 5  | 0.11 | 0.72 | 105 | 0.05 |



|                         |              |    |    |      |      |     |      |
|-------------------------|--------------|----|----|------|------|-----|------|
| Thunder Bay, Ontario    | <i>Svi33</i> | 38 | 7  | 0.26 | 0.81 | 89  | 0.08 |
|                         | <i>Svi18</i> | 38 | 9  | 1.00 | 0.86 | 16  | 0.53 |
|                         | <i>Svi6</i>  | 12 | 5  | 0.17 | 0.80 | 10  | 0.45 |
|                         | <i>Svi5</i>  | 12 | 7  | 1.00 | 0.89 | 18  | 0.37 |
|                         | <i>SviL7</i> | 12 | 5  | 0.67 | 0.79 | 233 | 0.02 |
|                         | <i>Svi17</i> | 12 | 3  | 0.00 | 0.55 | 101 | 0.03 |
|                         | <i>Svi33</i> | 12 | 3  | 0.17 | 0.62 | 83  | 0.04 |
|                         | <i>Svi18</i> | 12 | 7  | 1.00 | 0.91 | 12  | 0.54 |
| Saginaw Bay, MI         | <i>Svi6</i>  | 20 | 4  | 0.10 | 0.50 | 6   | 0.57 |
|                         | <i>Svi5</i>  | 20 | 7  | 0.80 | 0.81 | 18  | 0.37 |
|                         | <i>SviL7</i> | 20 | 5  | 1.00 | 0.81 | 12  | 0.38 |
|                         | <i>Svi16</i> | 20 | 6  | 0.40 | 0.64 | 265 | 0.02 |
|                         | <i>Svi17</i> | 20 | 3  | 0.20 | 0.48 | 103 | 0.03 |
|                         | <i>Svi33</i> | 20 | 6  | 0.20 | 0.83 | 85  | 0.07 |
|                         | <i>Svi18</i> | 20 | 6  | 1.00 | 0.79 | 10  | 0.55 |
| Oneida Lake, NY         | <i>Svi6</i>  | 20 | 3  | 0.20 | 0.48 | 8   | 0.33 |
|                         | <i>Svi5</i>  | 20 | 5  | 0.90 | 0.81 | 14  | 0.33 |
|                         | <i>SviL7</i> | 20 | 4  | 0.40 | 0.65 | 8   | 0.44 |
|                         | <i>Svi17</i> | 20 | 3  | 0.40 | 0.58 | 105 | 0.03 |
|                         | <i>Svi33</i> | 20 | 4  | 0.40 | 0.72 | 85  | 0.05 |
|                         | <i>Svi18</i> | 20 | 5  | 1.00 | 0.81 | 10  | 0.45 |
| Lake Manitoba, Manitoba | <i>Svi6</i>  | 34 | 4  | 0.00 | 0.69 | 6   | 0.57 |
|                         | <i>Svi5</i>  | 34 | 8  | 0.59 | 0.84 | 16  | 0.47 |
|                         | <i>SviL7</i> | 34 | 10 | 0.76 | 0.89 | 26  | 0.37 |
|                         | <i>Svi16</i> | 34 | 8  | 0.41 | 0.64 | 265 | 0.03 |
|                         | <i>Svi17</i> | 34 | 4  | 0.12 | 0.70 | 103 | 0.04 |
|                         | <i>Svi33</i> | 34 | 5  | 0.41 | 0.76 | 87  | 0.06 |
|                         | <i>Svi18</i> | 34 | 7  | 1.00 | 0.85 | 12  | 0.54 |
| Lake Winnipeg, Manitoba | <i>Svi6</i>  | 38 | 8  | 0.16 | 0.83 | 16  | 0.47 |
|                         | <i>Svi5</i>  | 38 | 16 | 1.00 | 0.93 | 36  | 0.43 |
|                         | <i>SviL7</i> | 38 | 10 | 0.63 | 0.86 | 20  | 0.48 |
|                         | <i>Svi16</i> | 38 | 8  | 0.42 | 0.65 | 267 | 0.03 |
|                         | <i>Svi17</i> | 38 | 4  | 0.11 | 0.59 | 103 | 0.04 |
|                         | <i>Svi33</i> | 38 | 5  | 0.26 | 0.64 | 85  | 0.06 |
|                         | <i>Svi18</i> | 38 | 10 | 1.00 | 0.89 | 18  | 0.53 |
| Lac Mistassini, Quebec  | <i>Svi6</i>  | 40 | 6  | 0.10 | 0.78 | 10  | 0.55 |
|                         | <i>Svi5</i>  | 40 | 14 | 0.95 | 0.94 | 38  | 0.36 |
|                         | <i>SviL7</i> | 40 | 10 | 0.65 | 0.85 | 245 | 0.04 |
|                         | <i>Svi16</i> | 40 | 8  | 0.55 | 0.76 | 273 | 0.03 |
|                         | <i>Svi17</i> | 40 | 4  | 0.05 | 0.75 | 103 | 0.04 |
|                         | <i>Svi33</i> | 40 | 3  | 0.35 | 0.64 | 83  | 0.04 |
|                         | <i>Svi18</i> | 40 | 9  | 0.95 | 0.89 | 16  | 0.53 |

**Table S5.**  $F_{ST}$  values among populations of Walleye. Populations are (1) Hatchet Creek, Coosa Drainage, AL, (2) John Allen Fish Hatchery, Tombigbee drainage, AL, (3) Fellows Lake, MO, (4) Stockton Lake, MO, (5) Beaver/Table Rock Lake, AK/MO, (6) James/Table Rock Lake, MO, (7) Mozingo Lake, MO, (8) Smithville Lake, MO, (9) Current River, MO, (10) Black River, AK, (11) Clinch and Powell Rivers, VA, (12) Lake Fontana, NC, (13) Nantahala Lake, NC, (14) Lake Santeetlah, NC, (15) Bear Lake, NC, (16) Wolf Lake, NC, (17) Lake James, NC, (18) Lake Hiwassee, NC, (19) Lake Glenville, NC, (20) New River, VA, (21) Barren River, KY, (22) Goose Creek, KY, (23) Rockcastle River, KY (24) Levisa and Russell Forks, KY, (25) Allegheny River, PA, (26) Lake Erie, (27) Lake Ontario, (28) Mille Lacs, MN, (29) Lake Michigan, (30) Grand River, MI, (31) Flint River, MI, (32) St. Mary's River, MI, (33) Thunder Bay, ON, (34) Saginaw Bay, MI, (35) Oneida Lake, NY, (36) Lake Manitoba, MB, (37) Lake Winnipeg, MB, and (38) Lac Mistassini, QC.

|    | 1     | 2     | 3     | 4     | 5     | 6     | 7     | 8     | 9     | 10    | 11    | 12    |
|----|-------|-------|-------|-------|-------|-------|-------|-------|-------|-------|-------|-------|
| 1  | 0.0   |       |       |       |       |       |       |       |       |       |       |       |
| 2  | 0.191 | 0.0   |       |       |       |       |       |       |       |       |       |       |
| 3  | 0.517 | 0.444 | 0.0   |       |       |       |       |       |       |       |       |       |
| 4  | 0.400 | 0.355 | 0.062 | 0.0   |       |       |       |       |       |       |       |       |
| 5  | 0.468 | 0.434 | 0.201 | 0.136 | 0.0   |       |       |       |       |       |       |       |
| 6  | 0.463 | 0.409 | 0.225 | 0.148 | 0.069 | 0.0   |       |       |       |       |       |       |
| 7  | 0.459 | 0.413 | 0.219 | 0.143 | 0.041 | 0.051 | 0.0   |       |       |       |       |       |
| 8  | 0.493 | 0.447 | 0.202 | 0.143 | 0.026 | 0.056 | 0.022 | 0.0   |       |       |       |       |
| 9  | 0.329 | 0.274 | 0.357 | 0.263 | 0.306 | 0.250 | 0.280 | 0.314 | 0.0   |       |       |       |
| 10 | 0.292 | 0.222 | 0.351 | 0.260 | 0.311 | 0.280 | 0.279 | 0.328 | 0.049 | 0.0   |       |       |
| 11 | 0.189 | 0.159 | 0.199 | 0.143 | 0.211 | 0.204 | 0.204 | 0.214 | 0.171 | 0.151 | 0.0   |       |
| 12 | 0.346 | 0.306 | 0.154 | 0.080 | 0.120 | 0.110 | 0.100 | 0.127 | 0.218 | 0.221 | 0.128 | 0.0   |
| 13 | 0.482 | 0.421 | 0.259 | 0.160 | 0.216 | 0.204 | 0.192 | 0.203 | 0.300 | 0.321 | 0.208 | 0.064 |
| 14 | 0.458 | 0.405 | 0.264 | 0.147 | 0.192 | 0.172 | 0.160 | 0.191 | 0.260 | 0.273 | 0.196 | 0.079 |
| 15 | 0.474 | 0.418 | 0.272 | 0.161 | 0.157 | 0.162 | 0.143 | 0.175 | 0.264 | 0.271 | 0.224 | 0.087 |
| 16 | 0.472 | 0.426 | 0.252 | 0.148 | 0.131 | 0.144 | 0.126 | 0.144 | 0.258 | 0.273 | 0.212 | 0.089 |
| 17 | 0.418 | 0.397 | 0.176 | 0.100 | 0.102 | 0.127 | 0.126 | 0.110 | 0.288 | 0.299 | 0.191 | 0.097 |
| 18 | 0.492 | 0.430 | 0.256 | 0.132 | 0.173 | 0.169 | 0.165 | 0.197 | 0.265 | 0.299 | 0.211 | 0.066 |
| 19 | 0.423 | 0.365 | 0.227 | 0.108 | 0.152 | 0.137 | 0.130 | 0.149 | 0.255 | 0.365 | 0.168 | 0.035 |
| 20 | 0.435 | 0.359 | 0.242 | 0.146 | 0.190 | 0.178 | 0.195 | 0.167 | 0.310 | 0.306 | 0.170 | 0.142 |
| 21 | 0.323 | 0.273 | 0.111 | 0.053 | 0.134 | 0.123 | 0.126 | 0.125 | 0.219 | 0.214 | 0.104 | 0.049 |
| 22 | 0.444 | 0.386 | 0.218 | 0.131 | 0.157 | 0.184 | 0.188 | 0.180 | 0.316 | 0.307 | 0.202 | 0.119 |
| 23 | 0.378 | 0.327 | 0.094 | 0.104 | 0.264 | 0.255 | 0.251 | 0.256 | 0.304 | 0.282 | 0.141 | 0.167 |
| 24 | 0.415 | 0.366 | 0.084 | 0.077 | 0.244 | 0.243 | 0.224 | 0.242 | 0.311 | 0.290 | 0.143 | 0.145 |
| 25 | 0.413 | 0.350 | 0.172 | 0.147 | 0.219 | 0.226 | 0.222 | 0.208 | 0.301 | 0.280 | 0.077 | 0.166 |
| 26 | 0.526 | 0.451 | 0.271 | 0.170 | 0.202 | 0.207 | 0.230 | 0.188 | 0.363 | 0.362 | 0.210 | 0.190 |
| 27 | 0.422 | 0.370 | 0.171 | 0.080 | 0.113 | 0.123 | 0.120 | 0.118 | 0.277 | 0.272 | 0.150 | 0.059 |
| 28 | 0.456 | 0.374 | 0.245 | 0.116 | 0.185 | 0.182 | 0.180 | 0.196 | 0.278 | 0.277 | 0.181 | 0.083 |
| 29 | 0.471 | 0.406 | 0.233 | 0.114 | 0.172 | 0.179 | 0.178 | 0.180 | 0.294 | 0.305 | 0.200 | 0.098 |
| 30 | 0.389 | 0.334 | 0.243 | 0.117 | 0.179 | 0.170 | 0.170 | 0.185 | 0.204 | 0.212 | 0.123 | 0.085 |

|    |       |       |       |       |       |       |       |       |       |       |       |       |
|----|-------|-------|-------|-------|-------|-------|-------|-------|-------|-------|-------|-------|
| 31 | 0.457 | 0.415 | 0.174 | 0.106 | 0.111 | 0.140 | 0.140 | 0.119 | 0.315 | 0.317 | 0.174 | 0.090 |
| 32 | 0.441 | 0.383 | 0.201 | 0.108 | 0.142 | 0.131 | 0.137 | 0.136 | 0.264 | 0.283 | 0.160 | 0.043 |
| 33 | 0.543 | 0.420 | 0.220 | 0.128 | 0.180 | 0.166 | 0.184 | 0.176 | 0.272 | 0.297 | 0.205 | 0.087 |
| 34 | 0.534 | 0.464 | 0.228 | 0.143 | 0.164 | 0.189 | 0.186 | 0.178 | 0.324 | 0.348 | 0.229 | 0.115 |
| 35 | 0.560 | 0.456 | 0.280 | 0.170 | 0.225 | 0.227 | 0.225 | 0.233 | 0.355 | 0.360 | 0.252 | 0.119 |
| 36 | 0.457 | 0.394 | 0.197 | 0.099 | 0.152 | 0.146 | 0.157 | 0.149 | 0.283 | 0.288 | 0.171 | 0.064 |
| 37 | 0.424 | 0.372 | 0.189 | 0.096 | 0.139 | 0.152 | 0.140 | 0.148 | 0.287 | 0.281 | 0.169 | 0.066 |
| 38 | 0.400 | 0.332 | 0.182 | 0.091 | 0.129 | 0.128 | 0.133 | 0.135 | 0.249 | 0.249 | 0.150 | 0.073 |

|    | 13    | 14    | 15    | 16    | 17    | 18    | 19    | 20    | 21    | 22    | 23    | 24    | 25    |
|----|-------|-------|-------|-------|-------|-------|-------|-------|-------|-------|-------|-------|-------|
| 1  |       |       |       |       |       |       |       |       |       |       |       |       |       |
| 2  |       |       |       |       |       |       |       |       |       |       |       |       |       |
| 3  |       |       |       |       |       |       |       |       |       |       |       |       |       |
| 4  |       |       |       |       |       |       |       |       |       |       |       |       |       |
| 5  |       |       |       |       |       |       |       |       |       |       |       |       |       |
| 6  |       |       |       |       |       |       |       |       |       |       |       |       |       |
| 7  |       |       |       |       |       |       |       |       |       |       |       |       |       |
| 8  |       |       |       |       |       |       |       |       |       |       |       |       |       |
| 9  |       |       |       |       |       |       |       |       |       |       |       |       |       |
| 10 |       |       |       |       |       |       |       |       |       |       |       |       |       |
| 11 |       |       |       |       |       |       |       |       |       |       |       |       |       |
| 12 |       |       |       |       |       |       |       |       |       |       |       |       |       |
| 13 | 0.0   |       |       |       |       |       |       |       |       |       |       |       |       |
| 14 | 0.130 | 0.0   |       |       |       |       |       |       |       |       |       |       |       |
| 15 | 0.145 | 0.079 | 0.0   |       |       |       |       |       |       |       |       |       |       |
| 16 | 0.154 | 0.073 | 0.014 | 0.0   |       |       |       |       |       |       |       |       |       |
| 17 | 0.160 | 0.129 | 0.143 | 0.113 | 0.0   |       |       |       |       |       |       |       |       |
| 18 | 0.112 | 0.100 | 0.088 | 0.094 | 0.113 | 0.0   |       |       |       |       |       |       |       |
| 19 | 0.072 | 0.061 | 0.079 | 0.081 | 0.079 | 0.059 | 0.0   |       |       |       |       |       |       |
| 20 | 0.189 | 0.200 | 0.209 | 0.214 | 0.128 | 0.214 | 0.131 | 0.0   |       |       |       |       |       |
| 21 | 0.115 | 0.101 | 0.116 | 0.116 | 0.088 | 0.105 | 0.073 | 0.082 | 0.0   |       |       |       |       |
| 22 | 0.191 | 0.166 | 0.169 | 0.169 | 0.127 | 0.139 | 0.138 | 0.164 | 0.093 | 0.0   |       |       |       |
| 23 | 0.254 | 0.258 | 0.276 | 0.282 | 0.247 | 0.271 | 0.231 | 0.213 | 0.096 | 0.256 | 0.0   |       |       |
| 24 | 0.256 | 0.244 | 0.269 | 0.261 | 0.227 | 0.258 | 0.217 | 0.237 | 0.093 | 0.262 | 0.020 | 0.0   |       |
| 25 | 0.250 | 0.247 | 0.279 | 0.253 | 0.186 | 0.261 | 0.197 | 0.150 | 0.120 | 0.226 | 0.146 | 0.162 | 0.0   |
| 26 | 0.271 | 0.236 | 0.230 | 0.232 | 0.167 | 0.251 | 0.197 | 0.083 | 0.116 | 0.163 | 0.150 | 0.267 | 0.203 |
| 27 | 0.119 | 0.076 | 0.113 | 0.098 | 0.025 | 0.082 | 0.033 | 0.097 | 0.050 | 0.092 | 0.214 | 0.205 | 0.150 |
| 28 | 0.116 | 0.110 | 0.103 | 0.122 | 0.137 | 0.060 | 0.058 | 0.143 | 0.075 | 0.086 | 0.229 | 0.231 | 0.218 |
| 29 | 0.143 | 0.126 | 0.111 | 0.120 | 0.116 | 0.053 | 0.068 | 0.155 | 0.084 | 0.090 | 0.239 | 0.236 | 0.225 |
| 30 | 0.139 | 0.103 | 0.140 | 0.124 | 0.108 | 0.092 | 0.056 | 0.146 | 0.080 | 0.136 | 0.243 | 0.237 | 0.196 |
| 31 | 0.140 | 0.149 | 0.183 | 0.154 | 0.027 | 0.140 | 0.091 | 0.101 | 0.083 | 0.106 | 0.238 | 0.227 | 0.154 |
| 32 | 0.081 | 0.086 | 0.115 | 0.096 | 0.073 | 0.069 | 0.030 | 0.112 | 0.058 | 0.102 | 0.228 | 0.221 | 0.180 |
| 33 | 0.088 | 0.128 | 0.106 | 0.115 | 0.148 | 0.091 | 0.087 | 0.173 | 0.091 | 0.084 | 0.251 | 0.257 | 0.239 |
| 34 | 0.175 | 0.153 | 0.157 | 0.143 | 0.121 | 0.087 | 0.126 | 0.206 | 0.106 | 0.058 | 0.280 | 0.271 | 0.257 |
| 35 | 0.186 | 0.178 | 0.165 | 0.153 | 0.176 | 0.106 | 0.114 | 0.238 | 0.131 | 0.088 | 0.299 | 0.294 | 0.290 |
| 36 | 0.109 | 0.096 | 0.111 | 0.108 | 0.075 | 0.071 | 0.046 | 0.116 | 0.048 | 0.059 | 0.219 | 0.225 | 0.181 |

|    |       |       |       |       |       |       |       |       |       |       |       |       |       |
|----|-------|-------|-------|-------|-------|-------|-------|-------|-------|-------|-------|-------|-------|
| 37 | 0.108 | 0.102 | 0.126 | 0.116 | 0.054 | 0.088 | 0.034 | 0.144 | 0.073 | 0.119 | 0.235 | 0.224 | 0.190 |
| 38 | 0.123 | 0.114 | 0.144 | 0.126 | 0.053 | 0.101 | 0.051 | 0.111 | 0.068 | 0.101 | 0.226 | 0.219 | 0.171 |
|    | 26    | 27    | 28    | 29    | 30    | 31    | 32    | 33    | 34    | 35    | 36    | 37    | 38    |
| 1  |       |       |       |       |       |       |       |       |       |       |       |       |       |
| 2  |       |       |       |       |       |       |       |       |       |       |       |       |       |
| 3  |       |       |       |       |       |       |       |       |       |       |       |       |       |
| 4  |       |       |       |       |       |       |       |       |       |       |       |       |       |
| 5  |       |       |       |       |       |       |       |       |       |       |       |       |       |
| 6  |       |       |       |       |       |       |       |       |       |       |       |       |       |
| 7  |       |       |       |       |       |       |       |       |       |       |       |       |       |
| 8  |       |       |       |       |       |       |       |       |       |       |       |       |       |
| 9  |       |       |       |       |       |       |       |       |       |       |       |       |       |
| 10 |       |       |       |       |       |       |       |       |       |       |       |       |       |
| 11 |       |       |       |       |       |       |       |       |       |       |       |       |       |
| 12 |       |       |       |       |       |       |       |       |       |       |       |       |       |
| 13 |       |       |       |       |       |       |       |       |       |       |       |       |       |
| 14 |       |       |       |       |       |       |       |       |       |       |       |       |       |
| 15 |       |       |       |       |       |       |       |       |       |       |       |       |       |
| 16 |       |       |       |       |       |       |       |       |       |       |       |       |       |
| 17 |       |       |       |       |       |       |       |       |       |       |       |       |       |
| 18 |       |       |       |       |       |       |       |       |       |       |       |       |       |
| 19 |       |       |       |       |       |       |       |       |       |       |       |       |       |
| 20 |       |       |       |       |       |       |       |       |       |       |       |       |       |
| 21 |       |       |       |       |       |       |       |       |       |       |       |       |       |
| 22 |       |       |       |       |       |       |       |       |       |       |       |       |       |
| 23 |       |       |       |       |       |       |       |       |       |       |       |       |       |
| 24 |       |       |       |       |       |       |       |       |       |       |       |       |       |
| 25 |       |       |       |       |       |       |       |       |       |       |       |       |       |
| 26 | 0.0   |       |       |       |       |       |       |       |       |       |       |       |       |
| 27 | 0.152 | 0.0   |       |       |       |       |       |       |       |       |       |       |       |
| 28 | 0.178 | 0.084 | 0.0   |       |       |       |       |       |       |       |       |       |       |
| 29 | 0.158 | 0.081 | 0.013 | 0.0   |       |       |       |       |       |       |       |       |       |
| 30 | 0.208 | 0.060 | 0.071 | 0.097 | 0.0   |       |       |       |       |       |       |       |       |
| 31 | 0.170 | 0.021 | 0.136 | 0.132 | 0.112 | 0.0   |       |       |       |       |       |       |       |
| 32 | 0.183 | 0.032 | 0.071 | 0.099 | 0.053 | 0.056 | 0.0   |       |       |       |       |       |       |
| 33 | 0.210 | 0.099 | 0.048 | 0.076 | 0.112 | 0.125 | 0.051 | 0.0   |       |       |       |       |       |
| 34 | 0.213 | 0.098 | 0.101 | 0.085 | 0.132 | 0.120 | 0.071 | 0.063 | 0.0   |       |       |       |       |
| 35 | 0.262 | 0.141 | 0.061 | 0.062 | 0.151 | 0.178 | 0.112 | 0.081 | 0.050 | 0.0   |       |       |       |
| 36 | 0.152 | 0.036 | 0.048 | 0.057 | 0.061 | 0.071 | 0.016 | 0.050 | 0.054 | 0.078 | 0.0   |       |       |
| 37 | 0.215 | 0.008 | 0.045 | 0.101 | 0.065 | 0.065 | 0.049 | 0.103 | 0.131 | 0.158 | 0.066 | 0.0   |       |
| 38 | 0.191 | 0.006 | 0.092 | 0.109 | 0.057 | 0.039 | 0.039 | 0.087 | 0.117 | 0.155 | 0.059 | 0.007 | 0.0   |

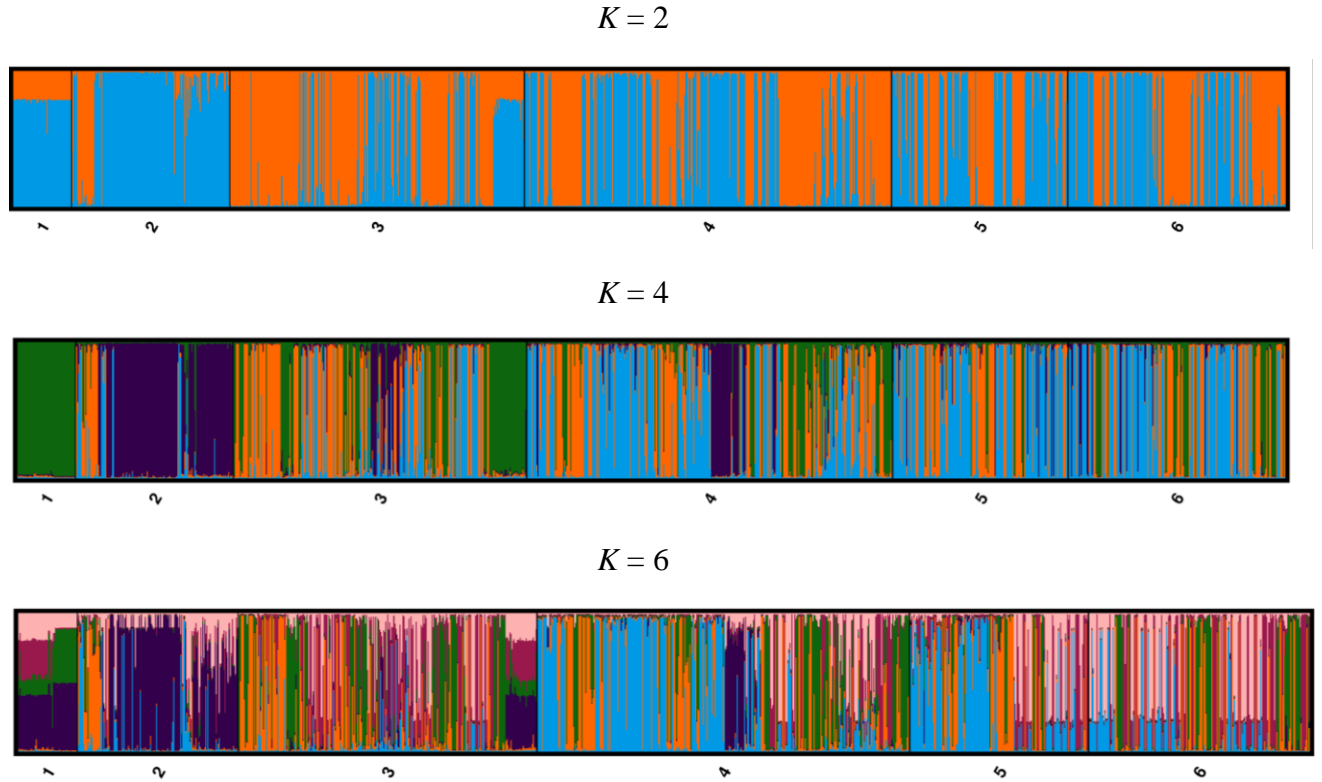

**Figure S1.** Structure plots representative of population genetic structuring of Walleye populations grouped within watersheds at different levels of  $K$ . The watersheds are designated: (1) Mobile Bay drainage, (2) Mississippi River, (3) Tennessee River, (4) New River, (5) Ohio River, and (6) Great Lakes.

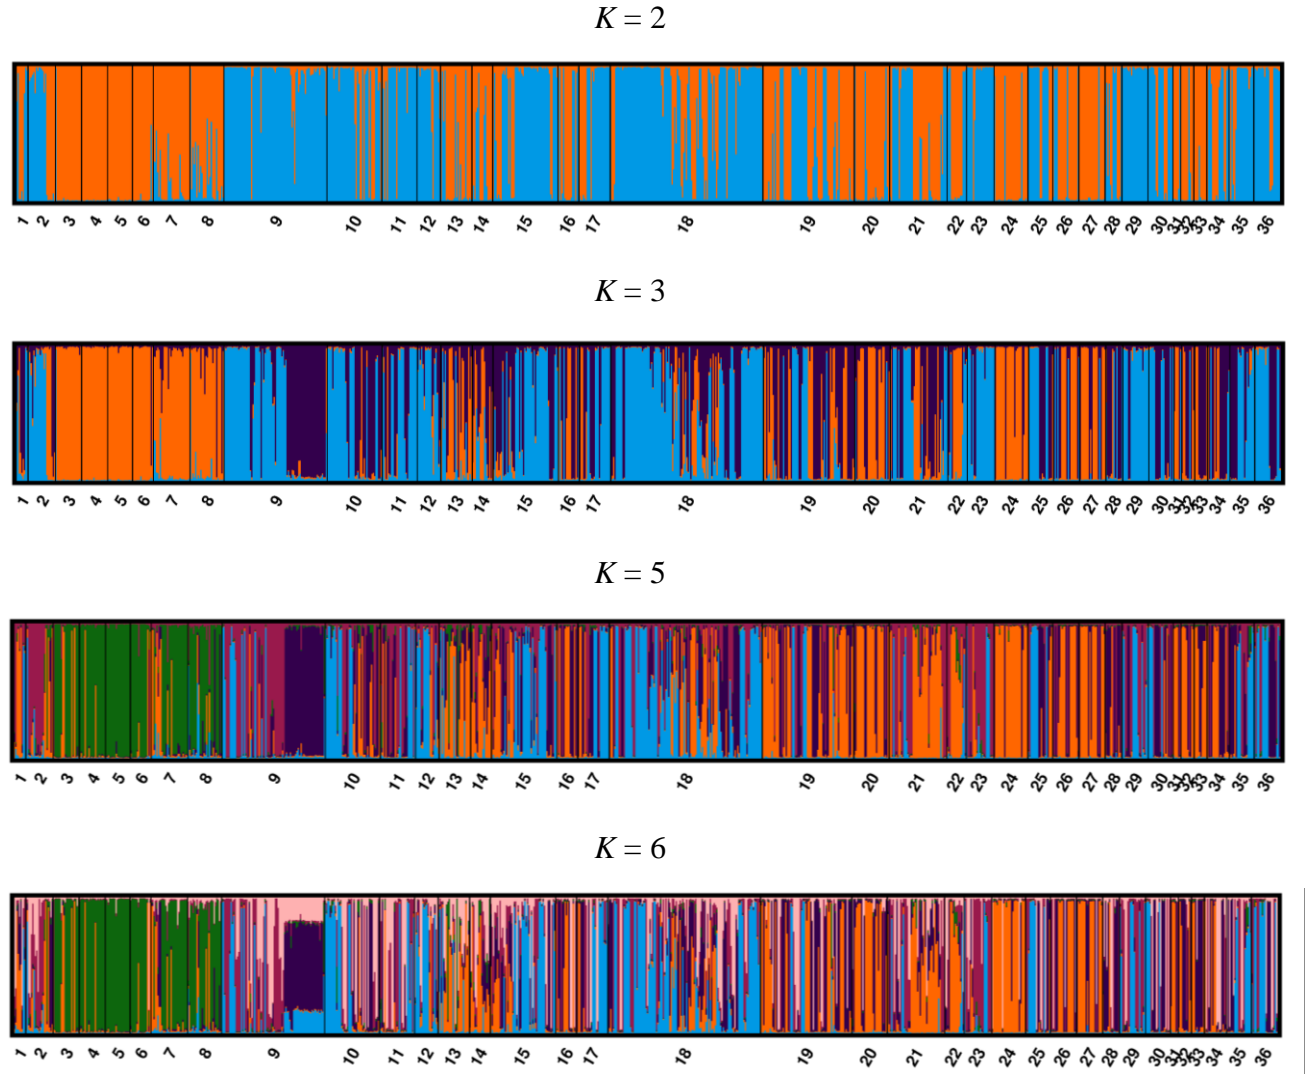

**Figure S2.** Structure plots representative of population genetic structuring of Walleye populations from the Mississippi, Tennessee, New, and Ohio River drainages and the Great Lakes at different levels of  $K$ . Populations are (1) Fellows Lake, MO, (2) Stockton Lake, MO, (3) Beaver/Table Rock Lake, AK/MO, (4) James/Table Rock Lake, MO, (5) Mazingo Lake, MO, (6) Smithville Lake, MO, (7) Current River, MO, (8) Black River, AK, (9) Clinch and Powell Rivers, VA, (10) Lake Fontana, NC, (11) Nantahala Lake, NC, (12) Lake Santeetlah, NC, (13) Bear Lake, NC, (14) Wolf Lake, NC, (15) Lake James, NC, (16) Lake Hiwassee, NC, (17) Lake Glenville, NC, (18) New River, VA, (19) Barren River, KY, (20) Goose Creek, KY, (21) Rockcastle River, KY (22) Levisa and Russell Forks, KY, (23) Allegheny River, PA, (24) Lake Erie, (25) Lake Ontario, (26) Mille Lacs, MN, (27) Lake Michigan, (28) Grand River, MI, (29) Flint River, MI, (30) St. Mary's River, MI, (31) Thunder Bay, Ontario, (32) Saginaw Bay, MI, (33) Oneida Lake, NY, (34) Lake Manitoba, Manitoba, (35) Lake Winnipeg, Manitoba, and (36) Lac Mistassini, Quebec.

$K = 2$

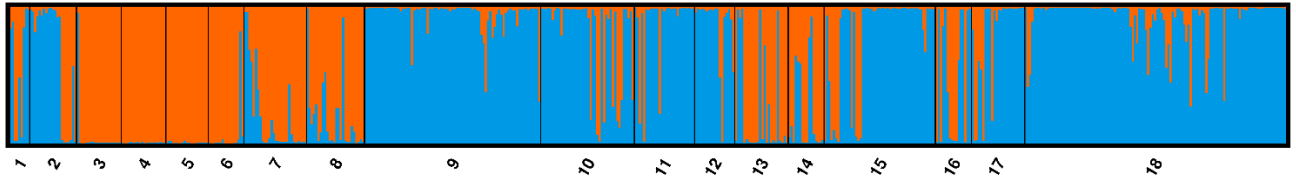

$K = 3$

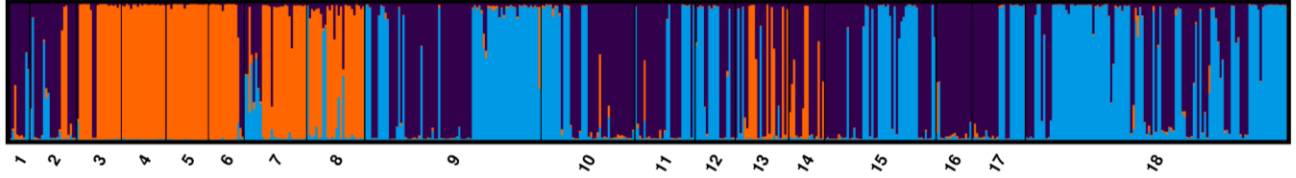

$K = 5$

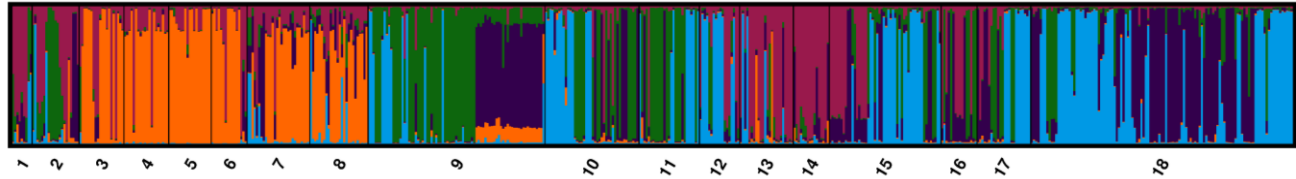

**Figure S3.** Structure plots representative of population genetic structuring of Walleye populations from the Mississippi, Tennessee, and New River drainages at different levels of  $K$ . Populations are (1) Fellows Lake, MO, (2) Stockton Lake, MO, (3) Beaver/Table Rock Lake, AK/MO, (4) James/Table Rock Lake, MO, (5) Mozingo Lake, MO, (6) Smithville Lake, MO, (7) Current River, MO, (8) Black River, AK, (9) Clinch and Powell Rivers, TN, (10) Lake Fontana, NC, (11) Nantahala Lake, NC, (12) Lake Santeetlah, NC, (13) Bear Lake, NC, (14) Wolf Lake, NC, (15) Lake James, NC, (16) Lake Hiwassee, NC, (17) Lake Glenville, NC, (18) New River, VA.

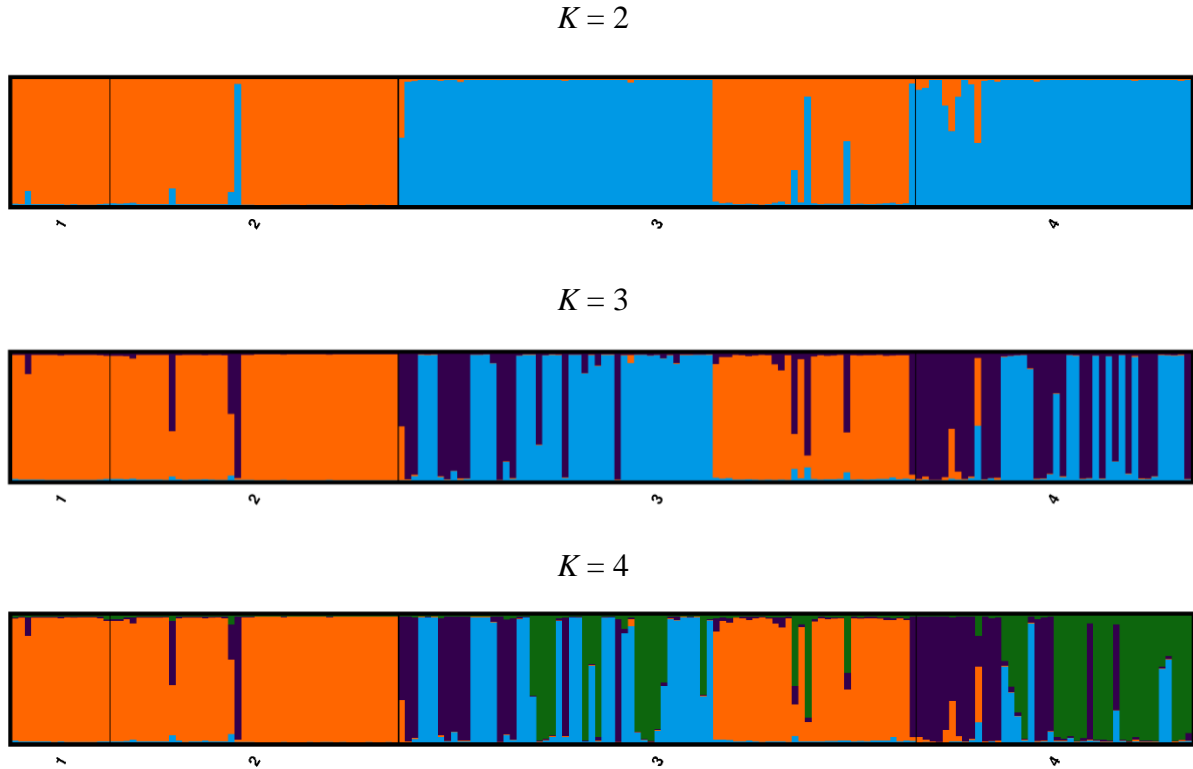

**Figure S4.** STRUCTURE plots representative of population genetic structuring of Walleye populations across three southern drainages. Populations are (1) Hatchet Creek, Coosa Drainage, AL, (2) John Allen Fish Hatchery, Tombigbee drainage, AL, (3) Clinch and Powell Rivers, TN, and (4) Lake Fontana, NC.
